# Supplementary material for: Laser ablation-ICP-TOFMS imaging of germ cell tumors of patients undergoing platinum-based chemotherapy
Source: Royal Society of Chemistry journal article supplement (doi:10.1039/d0mt00080a), 2020-06-05
Supplement: d0mt00080a1.pdf [file d0mt00080a1.pdf]

**Supporting Information to**  
**Laser ablation-ICP-TOFMS imaging of germ cell tumors of patients**  
**undergoing platinum-based chemotherapy**

Sarah Theiner<sup>1\*</sup>, Andreas Schweikert<sup>1,2</sup>, Christine Haberler<sup>3</sup>, Andreas Peyrl<sup>4</sup>, Gunda Koellensperger<sup>1</sup>

<sup>1</sup> Institute of Analytical Chemistry, University of Vienna, Waehringer Strasse 38, 1090 Vienna, Austria

<sup>2</sup> Institute of Inorganic Chemistry, University of Vienna, Waehringer Strasse 42, 1090 Vienna, Austria

<sup>3</sup> Clinical Institute of Neurology, Medical University of Vienna, Waehringer Guertel 18-20, 1090 Vienna, Austria

<sup>4</sup> Department of Pediatrics and Adolescent Medicine, Medical University of Vienna, Waehringer Guertel 18-20, 1090 Vienna, Austria

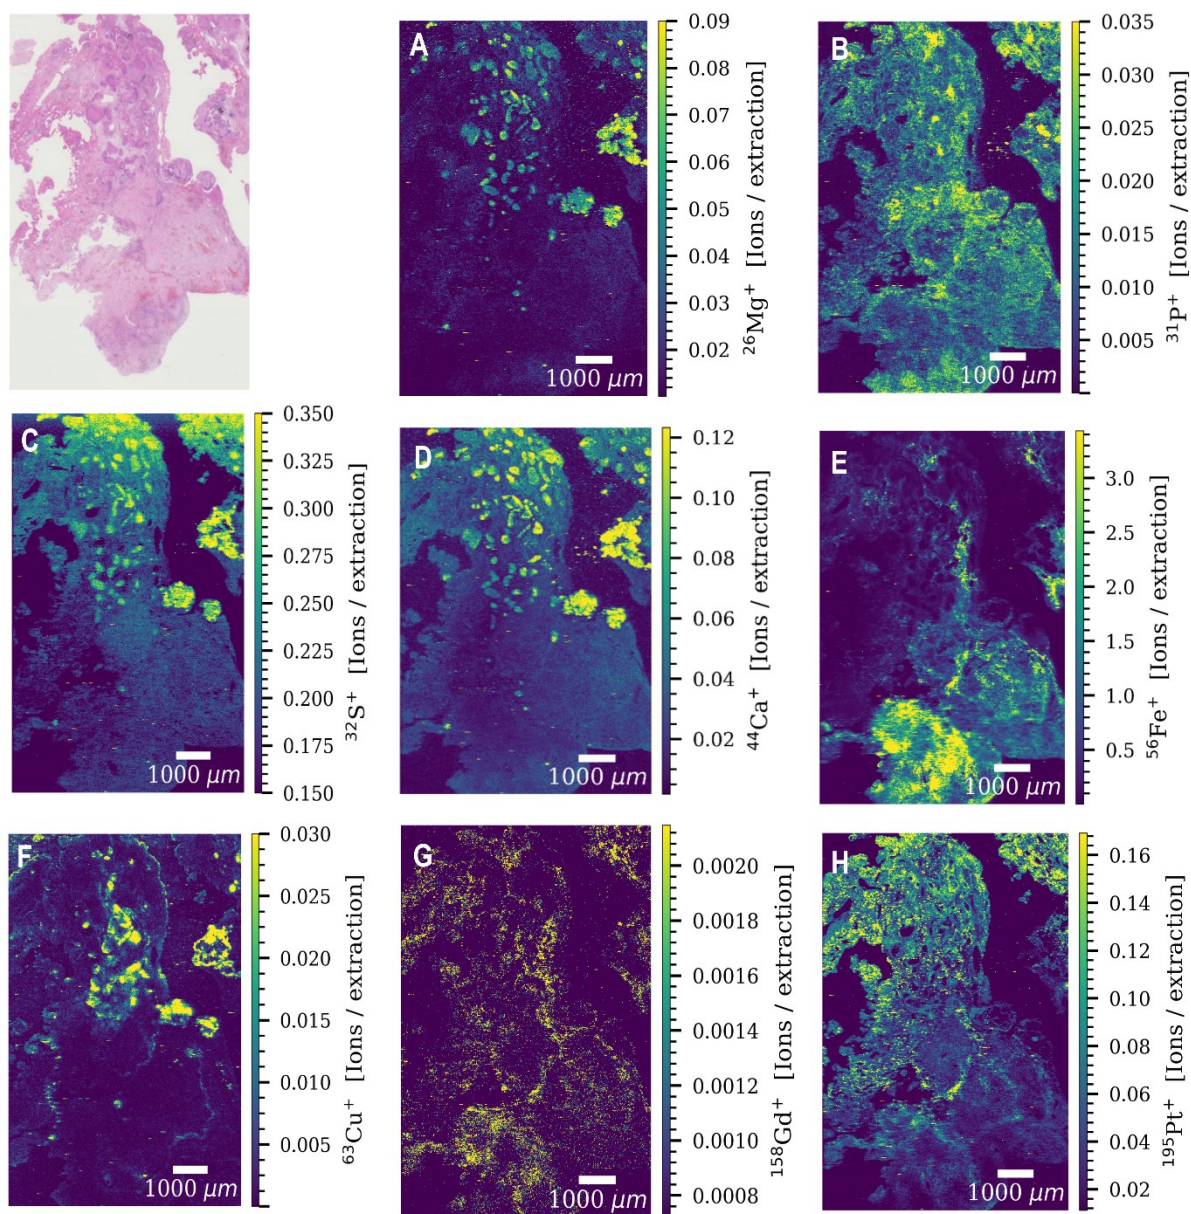

**Figure S1.** Signal intensity maps of (A)  $^{26}\text{Mg}^+$ , (B)  $^{31}\text{P}^+$ , (C)  $^{32}\text{S}^+$ , (D)  $^{44}\text{Ca}^+$ , (E)  $^{56}\text{Fe}^+$ , (F)  $^{63}\text{Cu}^+$ , (G)  $^{158}\text{Gd}^+$  and (H)  $^{195}\text{Pt}^+$  of a germ cell tumor tissue section of patient 1 obtained by LA-ICP-TOFMS imaging and the corresponding HE stained section of an adjacent slide. The following laser parameters were used: a square spot size of 20  $\mu\text{m}$ , a fixed dosage mode of 2 and a repetition rate of 30 Hz. The parallel line scans overlapped one another by 10  $\mu\text{m}$ .

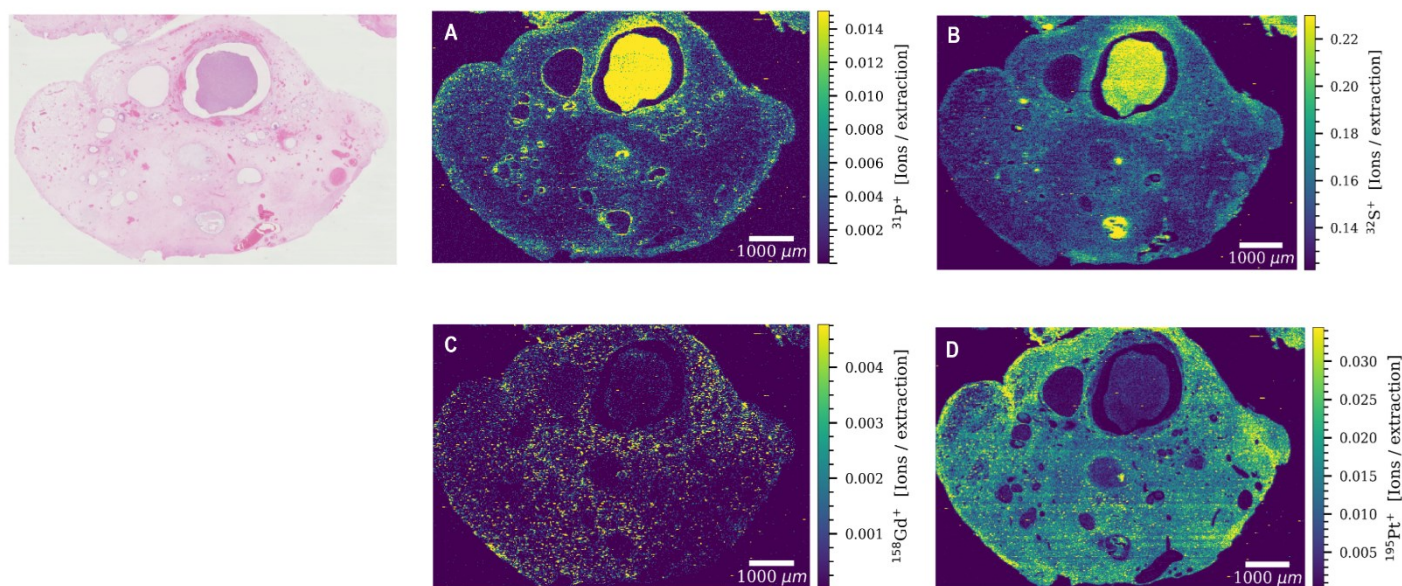

**Figure S2.** Signal intensity maps of (A)  $^{31}\text{P}^+$ , (B)  $^{32}\text{S}^+$ , (C)  $^{158}\text{Gd}^+$  and (D)  $^{195}\text{Pt}^+$  of a germ cell tumor tissue section of patient 2 obtained by LA-ICP-TOFMS imaging and the corresponding HE stained section of an adjacent slide. The following laser parameters were used: a square spot size of 20  $\mu\text{m}$ , a fixed dosage mode of 2 and a repetition rate of 30 Hz. The parallel line scans overlapped one another by 10  $\mu\text{m}$ .



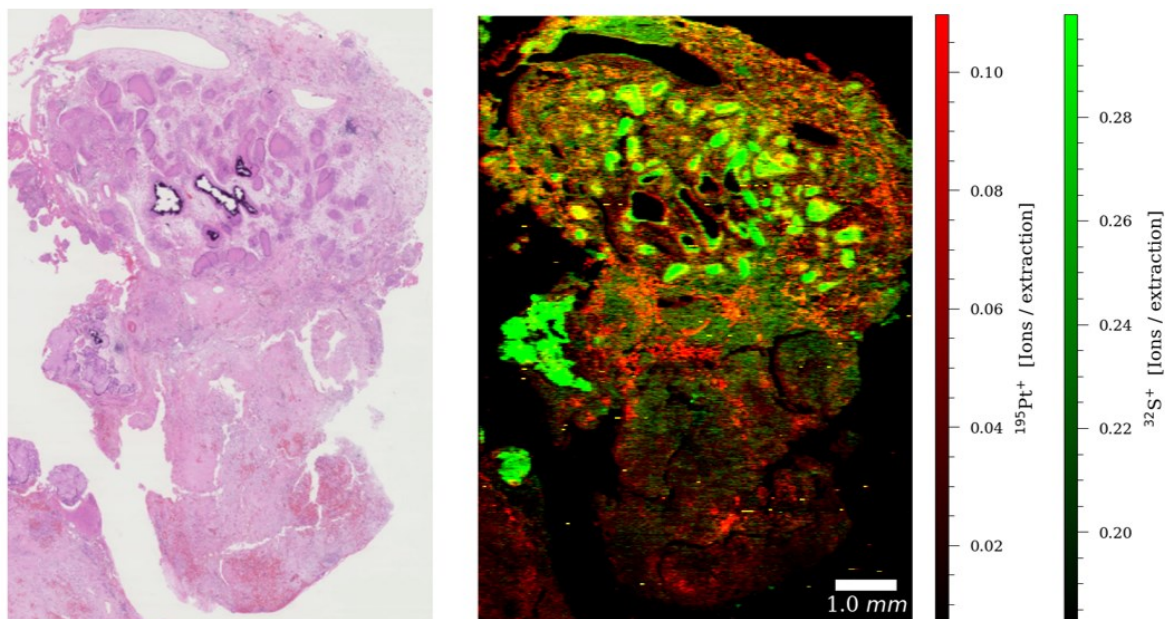

**Figure S3.** Correlation of the histology with the elemental distribution pattern obtained by LA-ICP-TOFMS. HE stained slide of a germ cell tumor section of patient 1 and overlay of  $^{195}\text{Pt}^+$  (red) and  $^{32}\text{S}^+$  (green) intensity maps. The following laser parameters were used: a square spot size of 20  $\mu\text{m}$ , a fixed dosage mode of 2 and a repetition rate of 30 Hz. The parallel line scans overlapped one another by 10  $\mu\text{m}$ .

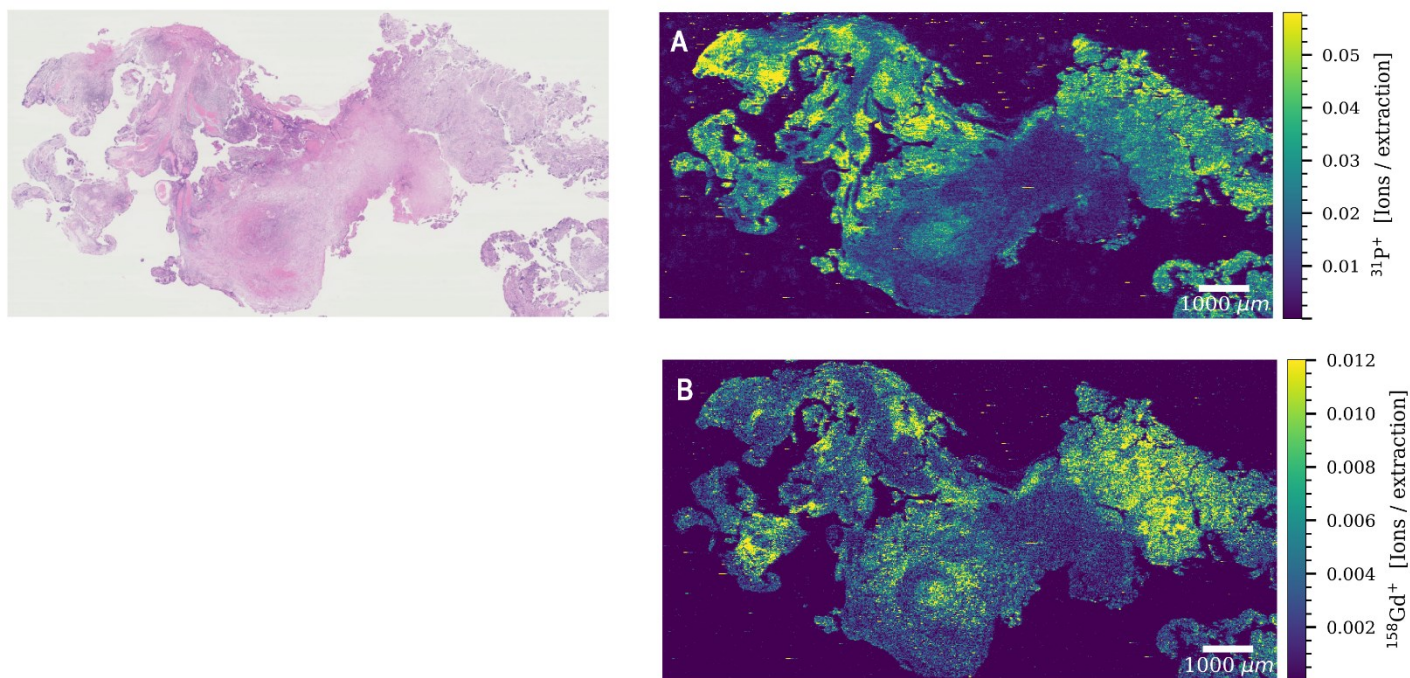

**Figure S4.** Signal intensity maps of (A)  $^{31}\text{P}^+$  and (B)  $^{158}\text{Gd}^+$  of a germ cell tumor tissue section of patient 3 (control sample) obtained by LA-ICP-TOFMS imaging and the corresponding HE stained section of an adjacent slide. The following laser parameters were used: a square spot size of 20  $\mu\text{m}$ , a fixed dosage mode of 2 and a repetition rate of 30 Hz. The parallel line scans overlapped one another by 10  $\mu\text{m}$ .
